# Supplementary material for: Human CLPP reverts the longevity phenotype of a fungal ClpP deletion strain
Source: PubMed Central journal article supplement — Nat Commun. 2013 Jan 29;4:1397–. doi: 10.1038/ncomms2397 (PMC3562451; doi:10.1038/ncomms2397), 2013-01-29
Supplement: ncomms2397-s1.pdf [file ncomms2397-s1.pdf]

**Human CLPP reverts the longevity phenotype of a fungal *ClpP* deletion strain**

Fabian Fischer, Andrea Weil, Andrea Hamann & Heinz D. Osiewacz

**SUPPLEMENTARY INFORMATION**

Supplementary Figures S1 to S5

**Supplementary Figure S1 | Susceptibility of  $\Delta PaClpP$  to various oxidative stressors and DTT-induced ER stress is not altered.**

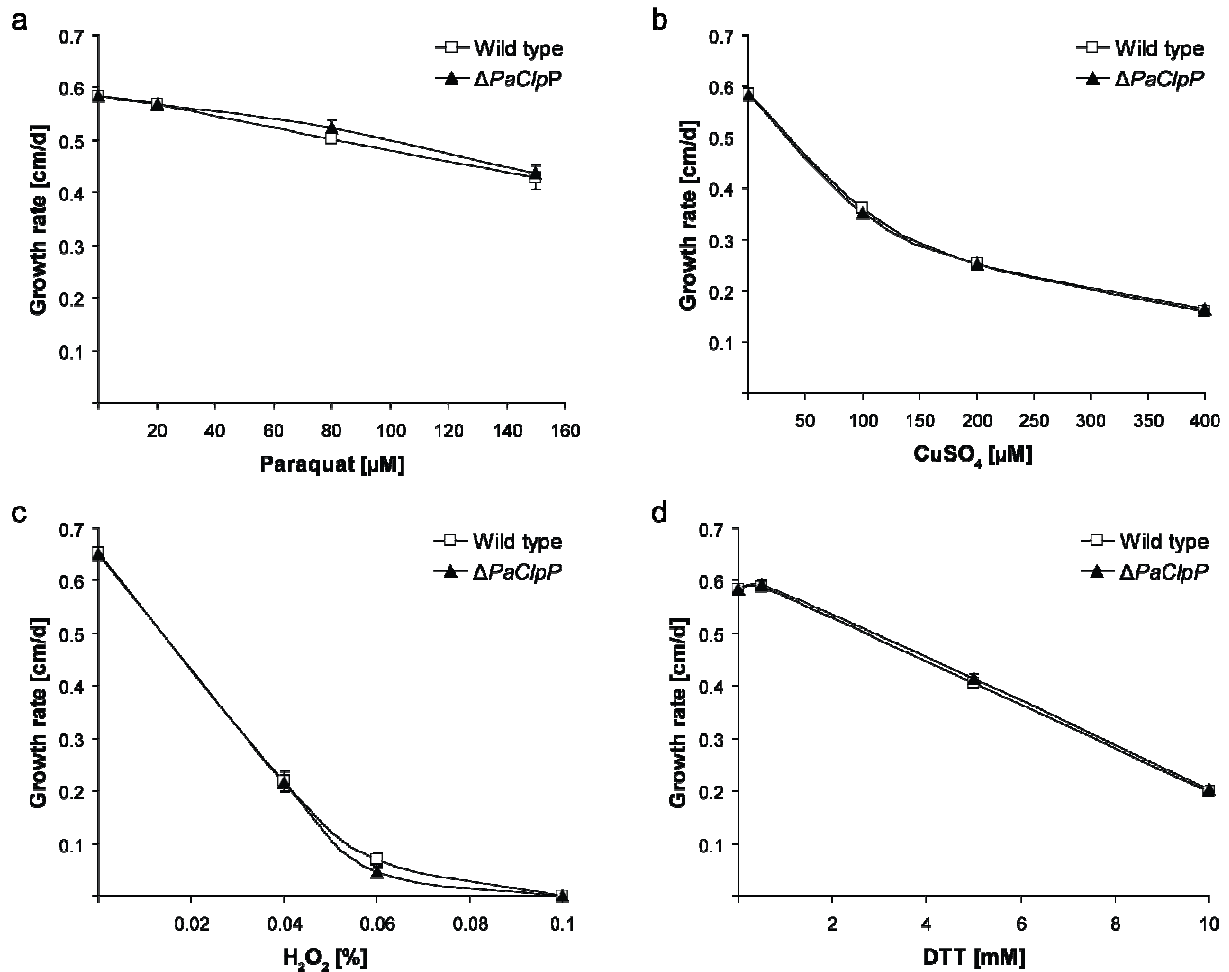

**Supplementary Figure S1 |** (a) Growth rate of wild type ( $n = 16$ ) and  $\Delta PaClpP$  ( $n = 16$ ) on M2 medium containing 0, 20, 80, or 150  $\mu\text{M}$  paraquat. Growth rate of  $\Delta PaClpP$  was unchanged compared to the wild type at any concentration tested. (b) Growth rate of wild type ( $n = 16$ ) and  $\Delta PaClpP$  ( $n = 16$ ) on M2 medium containing 0, 100, 200, or 400  $\mu\text{M}$   $\text{CuSO}_4$ . Growth rate of  $\Delta PaClpP$  was unchanged compared to the wild type at any concentration tested. (c) Growth rate of wild type ( $n = 16$ ) and  $\Delta PaClpP$  ( $n = 16$ ) on M2 medium containing 0, 0.04, 0.06, or 0.1 %  $\text{H}_2\text{O}_2$ . Growth rate of  $\Delta PaClpP$  was unchanged compared to the wild type at any concentration tested. (d) Growth rate of wild type ( $n = 16$ ) and  $\Delta PaClpP$  ( $n = 16$ ) on M2 medium containing 0, 0.5, 5, or 10 mM DTT. Growth rate of  $\Delta PaClpP$  was unchanged compared to the wild type at any concentration tested. Data points depicted in all graphs are mean growth rate  $\pm$  s.e. in centimetres per day.

**Supplementary Figure S2 | Southern and Western blot verification of a  $\Delta PaClpP/\Delta Palap$  double deletion strain.**

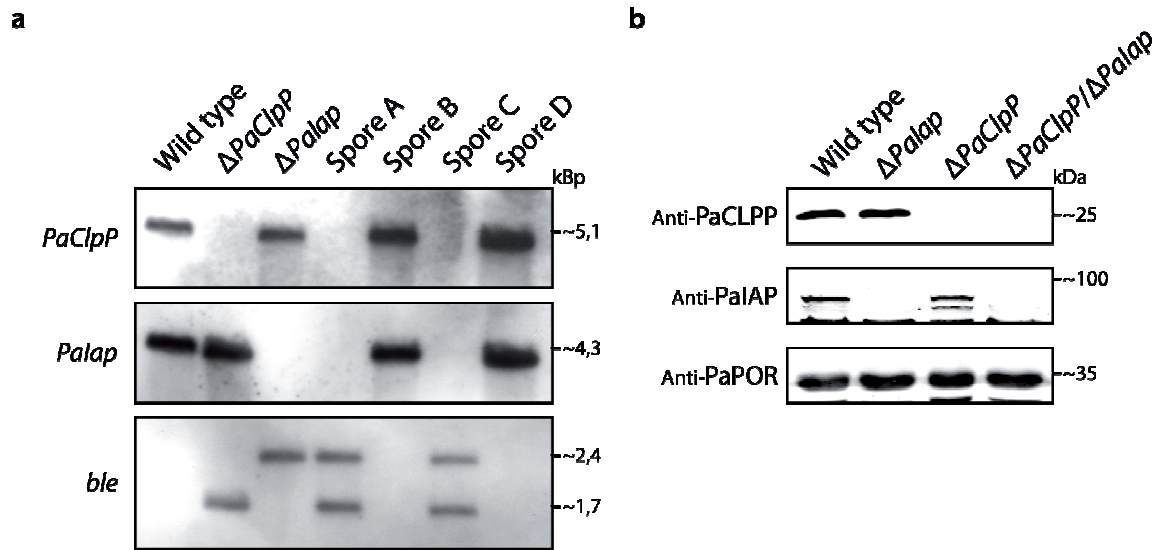

**Supplementary Figure S2 | (a)** Southern blot analysis of *Bgl*II digested genomic DNA from wild type,  $\Delta PaClpP$ ,  $\Delta Palap$ , and of four dikaryotic offspring, two of which were resistant (Spore A and C) and two of which were sensitive (Spore B and D) to phleomycin, isolated from a single recombined ascus resulting from a cross between  $\Delta PaClpP$  and  $\Delta Palap$ . The two offspring Spore A and C contain the concomitant deletion of *PaClpP* and *Palap*, as verified by absence of these genes in their genomic DNA and presence of two phleomycin resistance genes (*ble*) instead, and were termed  $\Delta PaClpP/\Delta Palap$ . For subsequent experiments, monokaryotic offspring were isolated from self-crosses of these dikaryotic  $\Delta PaClpP/\Delta Palap$  strains. **(b)** Representative Western blot analysis of mitochondrial protein extracts from wild type,  $\Delta PaClpP$ ,  $\Delta Palap$ , and  $\Delta PaClpP/\Delta Palap$ . Detection with a PaCLPP- and a PalAP-specific antibody confirms absence of PaCLPP and PalAP in the double deletion strain. PaPORIN (PaPOR) was detected as a loading control.

**Supplementary Figure S3 | CLPP and *i*-AAA are cooperatively involved in a mitochondrial heat stress response.**

**a**

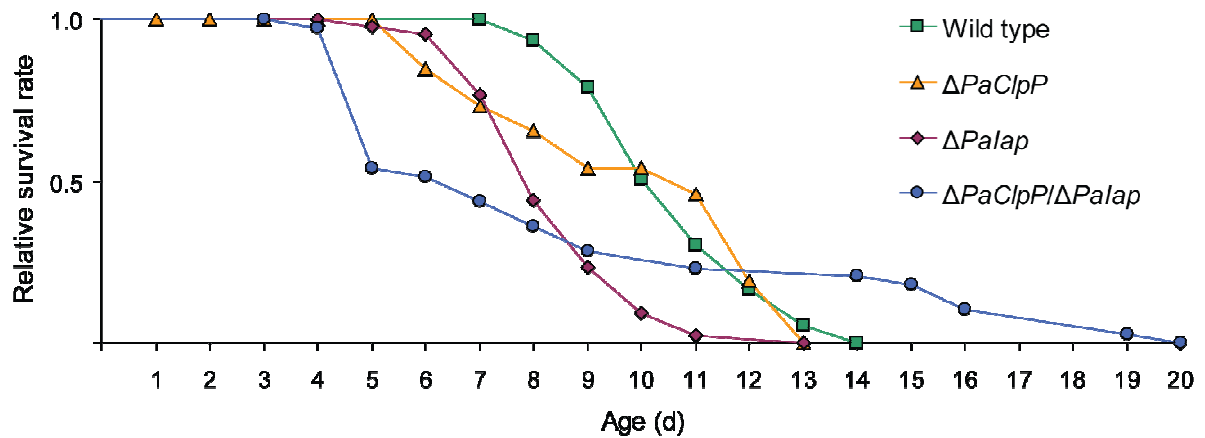

**b**

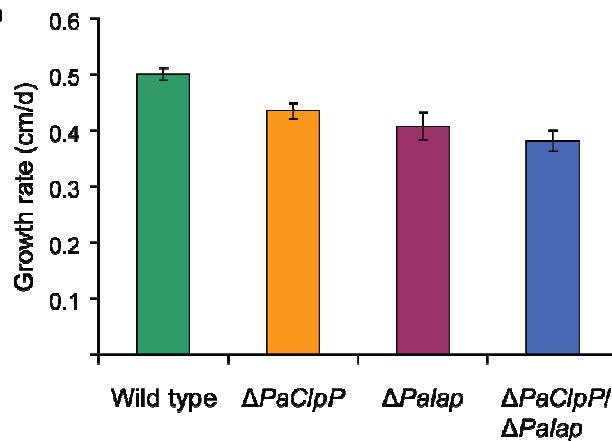

**c**

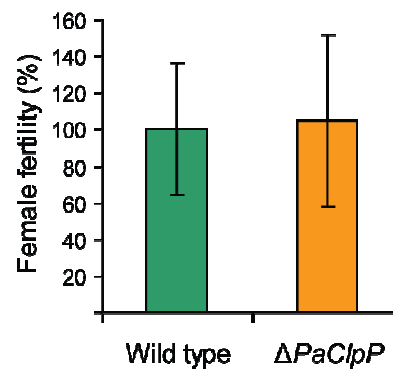

**Supplementary Figure S3 | (a)** Lifespan of wild type ( $10.8 \pm 0.2$ ;  $n = 109$ ),  $\Delta PaClpP$  ( $10.0 \pm 0.5$ ;  $n = 26$ ;  $P = 0.36$ ),  $\Delta Palap$  ( $8.5 \pm 0.2$ ;  $n = 43$ ;  $P = 2.2E-11$ ), and  $\Delta PaClpP/\Delta Palap$  ( $8.8 \pm 0.8$ ;  $n = 39$ ;  $P = 2.8E-05$ ) isolates at 37 °C. Data given in parentheses are mean lifespan  $\pm$  s.e. in days.  $P$ -values were determined in comparison to the wild-type sample by two-tailed Wilcoxon rank-sum test. **(b)** Growth rate of wild type ( $0.50 \pm 0.01$ ;  $n = 109$ ),  $\Delta PaClpP$  ( $0.44 \pm 0.01$ ;  $n = 26$ ;  $P = 2.4E-04$ ),  $\Delta Palap$  ( $0.41 \pm 0.02$ ;  $n = 43$ ;  $P = 2.1E-04$ ), and  $\Delta PaClpP/\Delta Palap$  ( $0.38 \pm 0.02$ ;  $n = 37$ ;  $P = 1.1E-07$ ) isolates at 37 °C. Data given in parentheses are mean growth rate  $\pm$  s.e. in centimetres per day.  $P$ -values were determined in comparison to the wild-type sample by two-tailed Wilcoxon rank-sum test. **(c)** Female fertility of wild type ( $100 \pm 36.1$ ;  $n = 11$ ) and  $\Delta PaClpP$  ( $105 \pm 46.7$ ;  $n = 11$ ;  $P = 0.82$  by two-tailed Wilcoxon rank-sum test) isolates at 37 °C. Data given in parentheses are mean female fertility  $\pm$  s.e. in %.

**Supplementary Figure S4 | LON protease abundance is unchanged in  $\Delta PaClpP$ .**

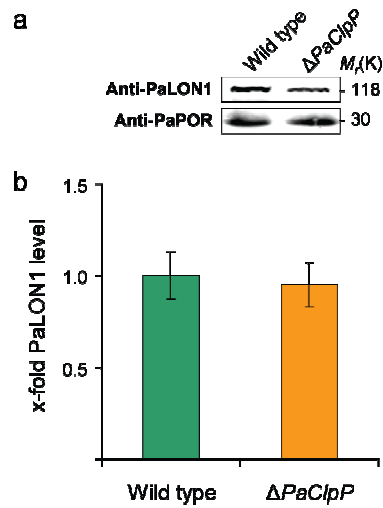

**Supplementary Figure S4 | (a)** Representative Western blot analysis of mitochondrial protein extracts from wild type and  $\Delta PaClpP$ . The PaLON1-specific antibody detects the ~118 kDa PaLON1 monomer in both samples. PaPORIN (PaPOR) was detected as a loading control and for quantification. **(b)** Quantitative Western blot analysis of mitochondrial protein extracts from wild type ( $1.00 \pm 0.13$ ;  $n = 6$ ) and  $\Delta PaClpP$  ( $0.95 \pm 0.12$ ;  $n = 6$ ;  $P = 0.63$  by two-tailed Student's t-test). The PaLON1 protein level was normalised to that of PaPOR and the mean wild-type PaLON1/PaPOR quotient was defined as 1-fold PaLON1 level. Data given in parentheses are mean PaLON1 level  $\pm$  s.e. in arbitrary units.

Supplementary Figure S5 | Southern blot verification of  $\Delta PaClpP/HsClpP\_OEx$  transformants.

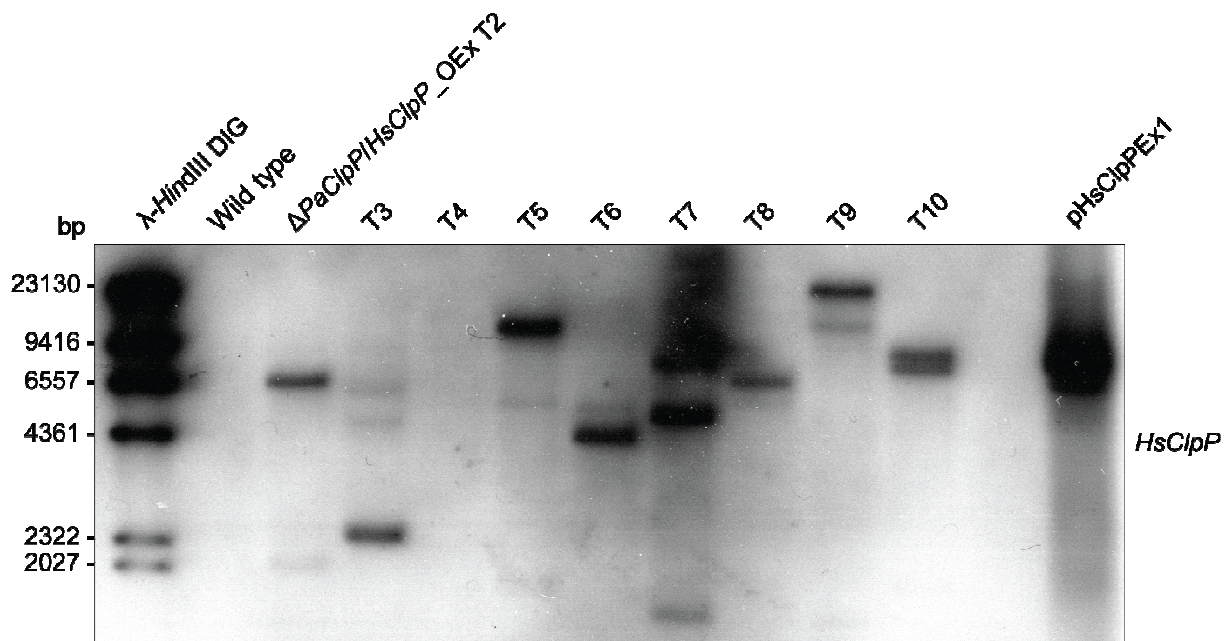

**Supplementary Figure S5** | Southern blot analysis of *HindIII* digested genomic DNA from wild type and the hygromycin B resistant  $\Delta PaClpP/HsClpP\_OEx$  transformants T2-T10. The *HsClpP*-specific hybridization probe visualises integration of the plasmid pHsClpPEX1, containing the full-length ORF of the human *ClpP* cDNA, into the transformants' genome. 5 ng of *HindIII* digested pHsClpPEX1 plasmid DNA were used as a control for the *HsClpP*-specific hybridization probe. The two independent transformants T2 and T6, each with a single integration of the vector into their genome, were selected for subsequent experiments and termed  $\Delta PaClpP/HsClpP\_OEx1$  and 2, respectively.
